# Supplementary material
Source: HighWire-hosted journal article supplement (https://erj.ersjournals.com/content/49/5/1601446)
Supplement: inline-supplementary-material-1 [file inline-supplementary-material-1.pdf]

## Supplementary material

**Supplementary Figure S1** Venn diagram for the ACOS group (N=231)

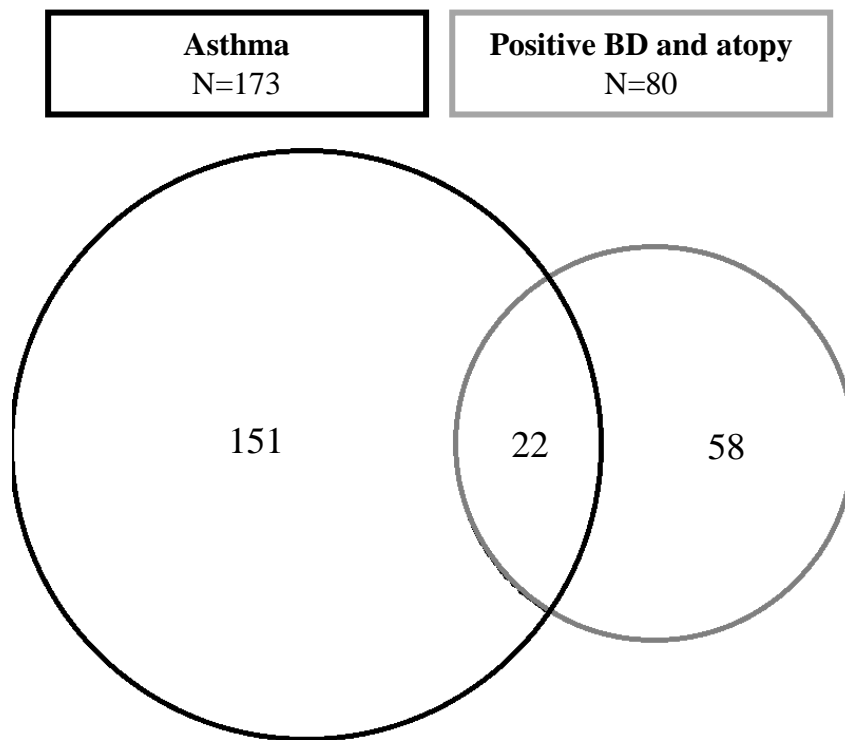

ACOS – Asthma and COPD Overlap Syndrome, BD – bronchodilator test

**Supplementary Table S1** Characteristics of patients with COPD according to GOLD classification (N=3 361)

|                                                                | GOLD categories                |                                |                                |                                | P-value        |
|----------------------------------------------------------------|--------------------------------|--------------------------------|--------------------------------|--------------------------------|----------------|
|                                                                | A<br>N=287<br>(a)              | B<br>N=1 023<br>(b)            | C<br>N=125<br>(c)              | D<br>N=1 926<br>(d)            |                |
| <b>Sex (female)</b> <sup>2</sup>                               | 94 (32.8%)                     | 335 (32.7%)                    | 35 (28.0%)                     | 545 (28.3%)                    | 0.055          |
| <b>Age at diagnosis</b> <sup>1</sup>                           | 58.3 (9.1) <sup>b</sup>        | 59.8 (9.2) <sup>a, c, d</sup>  | 56.6 (8.8) <sup>b</sup>        | 57.9 (8.8) <sup>b</sup>        | < <b>0.001</b> |
| <b>Age at inclusion</b> <sup>1</sup>                           | 63.8 (9.0) <sup>b, d</sup>     | 66.8 (9.1) <sup>a, c</sup>     | 63.8 (8.7) <sup>b, d</sup>     | 66.1 (8.5) <sup>a, c</sup>     | < <b>0.001</b> |
| <b>BMI</b> <sup>1</sup><br>(N=3 359)                           | 27.8 (4.4) <sup>c, d</sup>     | 28.4 (5.8) <sup>c, d</sup>     | 26.1 (4.7) <sup>a, b</sup>     | 26.5 (5.8) <sup>a, b</sup>     | < <b>0.001</b> |
| <b>FEV<sub>1</sub> (% predicted)</b> <sup>1</sup><br>(N=3 360) | 70.7 (13.3) <sup>b, c, d</sup> | 66.8 (12.5) <sup>a, c, d</sup> | 50.1 (18.7) <sup>a, b, d</sup> | 42.8 (14.7) <sup>a, b, c</sup> | < <b>0.001</b> |
| <b>FVC (% predicted)</b> <sup>1</sup><br>(N=3 359)             | 94.5 (17.1) <sup>b, c, d</sup> | 90.7 (16.3) <sup>a, c, d</sup> | 80.3 (20.6) <sup>a, b, d</sup> | 72.2 (19.1) <sup>a, b, c</sup> | < <b>0.001</b> |
| <b>CAT (total)</b> <sup>3</sup>                                | 6.0 (2.3) <sup>b, d</sup>      | 16.6 (6.2) <sup>a, c, d</sup>  | 6.6 (2.1) <sup>b, d</sup>      | 20.3 (7.0) <sup>a, b, c</sup>  | < <b>0.001</b> |
| <b>mMRC</b> <sup>3</sup>                                       | 0.7 (0.5) <sup>b, d</sup>      | 1.8 (0.9) <sup>a, c, d</sup>   | 0.8 (0.4) <sup>b, d</sup>      | 2.4 (0.9) <sup>a, b, c</sup>   | < <b>0.001</b> |
| <b>Atopy</b> <sup>2</sup>                                      | 37 (12.9%)                     | 109 (10.7%)                    | 8 (6.4%)                       | 206 (10.7%)                    | 0.275          |
| <b>Asthma</b> <sup>2</sup>                                     | 16 (5.6%)                      | 47 (4.6%)                      | 11 (8.8%)                      | 99 (5.1%)                      | 0.245          |
| <b>Number of moderate<br/>AE's /year</b> <sup>1</sup>          | 0.3 (0.4) <sup>c, d</sup>      | 0.3 (0.5) <sup>c, d</sup>      | 0.9 (1.0) <sup>a, b, d</sup>   | 1.3 (1.5) <sup>a, b, c</sup>   | < <b>0.001</b> |
| <b>Number of severe<br/>AE's /year</b> <sup>1</sup>            | 0.0 (0.0) <sup>c, d</sup>      | 0.0 (0.0) <sup>c, d</sup>      | 0.4 (0.5) <sup>a, b, d</sup>   | 0.6 (0.9) <sup>a, b, c</sup>   | < <b>0.001</b> |
| <b>Number of total AE's<br/>/12year</b> <sup>1</sup>           | 0.3 (0.4) <sup>c, d</sup>      | 0.3 (0.5) <sup>c, d</sup>      | 1.2 (1.1) <sup>a, b, d</sup>   | 1.9 (1.8) <sup>a, b, c</sup>   | < <b>0.001</b> |
| <b>Positive<br/>bronchodilator test</b><br>(N=2 524)           | 56 (25.3%) <sup>d</sup>        | 190 (24.9%) <sup>d</sup>       | 16 (17.0%)                     | 207 (14.3%) <sup>a, b</sup>    | < <b>0.001</b> |
| <b>Charlson index</b> <sup>2</sup><br>(N=3 360)                |                                |                                |                                |                                |                |
| <b>1</b>                                                       | 185 (64.5%) <sup>b, d</sup>    | 476 (46.5%) <sup>a, c</sup>    | 78 (62.4%) <sup>b, d</sup>     | 944 (49.0%) <sup>a, c</sup>    | < <b>0.001</b> |
| <b>2</b>                                                       | 56 (19.5%) <sup>b</sup>        | 273 (26.7%) <sup>a, c</sup>    | 22 (17.6%) <sup>b</sup>        | 454 (23.6%)                    | <b>0.017</b>   |
| <b>3</b>                                                       | 30 (10.5%)                     | 149 (14.6%)                    | 16 (12.8%)                     | 263 (13.7%)                    | 0.352          |
| <b>≥ 4</b>                                                     | 16 (5.6%) <sup>b, d</sup>      | 125 (12.2%) <sup>a</sup>       | 9 (7.2%) <sup>d</sup>          | 264 (13.7%) <sup>a, c</sup>    | < <b>0.001</b> |

AE's – acute exacerbations of COPD; BMI – Body Mass Index; CAT – COPD Assessment Test; FEV<sub>1</sub> – forced expiratory volume in one second; FVC – forced vital capacity; MRC – modified Medical Research Council dyspnea scale;

N – number of COPD patients

<sup>1</sup> Continuous variables are described by mean (standard deviation). Statistical significance tested by One way ANOVA. In variables, where the difference is significant, indexes a, b, c, d show statistically significant difference between two phenotypes (Tukey).

<sup>2</sup> Categorical variables are described by absolute (relative) frequencies. Relative frequencies are calculated only from the collected data. Differences between phenotypes are tested by Fisher exact test. In variables, where the difference is significant, indexes a, b, c, d show statistically significant difference between two phenotypes (Fisher exact test).

<sup>3</sup> Continuous variables are described by mean (standard deviation). Statistical significance tested by Kruskal-Wallis test. In variables, where the difference is significant, indexes a, b, c, d show statistically significant difference between two phenotypes.

**Supplementary Table S2:** Patient recruitment pattern in the POPE study

| Country        | <b>Pope Study cohort</b>                         |                                                                     |
|----------------|--------------------------------------------------|---------------------------------------------------------------------|
|                | Patients enrolled in the<br>pulmonologist office | Patients enrolled in hospital based<br>pulmonary outpatient clinics |
| Austria        | 0 (0.0%)                                         | 283 (100.0%)                                                        |
| Bulgaria       | 0 (0.0%)                                         | 272 (100.0%)                                                        |
| Croatia        | 0 (0.0%)                                         | 331 (100.0%)                                                        |
| Czech Republic | 232 (58.1%)                                      | 167 (41.9%)                                                         |
| Hungary        | 254 (70.9%)                                      | 104 (29.1%)                                                         |
| Poland         | 0 (0.0%)                                         | 430 (100.0%)                                                        |
| Russia         | 0 (0.0%)                                         | 355 (100.0%)                                                        |
| Serbia         | 64 (12.4%)                                       | 452 (87.6%)                                                         |
| Slovakia       | 302 (85.6%)                                      | 51 (14.4%)                                                          |
| Slovenia       | 65 (100.0%)                                      | 0 (0.0%)                                                            |
| <b>Total</b>   | <b>917 (27.3%)</b>                               | <b>2445 (72.7%)</b>                                                 |

**Supplementary Table S3** – Characteristics of patients presenting to hospital based outpatient clinics and pulmonologist offices

|                          | Outpatient clinics<br>(N=2445) | Pulmonologist office<br>(N=917) | P-value           |
|--------------------------|--------------------------------|---------------------------------|-------------------|
| <b>Total</b>             |                                |                                 |                   |
| Age                      | 66.0 (51.0; 81.0)              | 66.0 (53.0; 81.0)               | 0.203             |
| Number of cigarettes/day | 20.0 (10.0; 40.0)              | 20.0 (8.0; 40.0)                | <b>&lt; 0.001</b> |
| FEV <sub>1</sub> (%)     | 50.2 (23.2; 83.9)              | 56.6 (29.7; 85.5)               | <b>&lt; 0.001</b> |
| <b>ACOS</b>              | N=169                          | N=62                            |                   |
| Age                      | 61.0 (43.0; 78.0)              | 65.5 (53.0; 80.0)               | <b>&lt; 0.001</b> |
| Number of cigarettes/day | 20.0 (8.0; 40.0)               | 20.0 (10.0; 40.0)               | 0.396             |
| FEV <sub>1</sub> (%)     | 54.1 (29.0; 86.4)              | 51.9 (33.1; 83.3)               | 0.934             |
| <b>NON-AE</b>            | N=1434                         | N=691                           |                   |
| Age                      | 66.0 (52.0; 80.0)              | 66.0 (53.0; 81.0)               | 0.435             |
| Number of cigarettes/day | 20.0 (10.0; 40.0)              | 20.0 (8.0; 40.0)                | <b>&lt; 0.001</b> |
| FEV <sub>1</sub> (%)     | 53.0 (26.1; 87.3)              | 59.2 (31.6; 87.1)               | <b>&lt; 0.001</b> |
| <b>AE NON-CB</b>         | N=271                          | N=48                            |                   |
| Age                      | 65.0 (53.0; 82.0)              | 67.0 (52.0; 79.0)               | 0.216             |
| Number of cigarettes/day | 20.0 (10.0; 40.0)              | 20.0 (10.0; 40.0)               | 0.574             |
| FEV <sub>1</sub> (%)     | 42.6 (20.5; 73.9)              | 40.6 (23.1; 67.1)               | 0.993             |
| <b>AE CB</b>             | N=571                          | N=116                           |                   |
| Age                      | 66.0 (53.0; 81.0)              | 68.0 (56.0; 81.0)               | 0.123             |
| Number of cigarettes/day | 20.0 (10.0; 40.0)              | 20.0 (10.0; 40.0)               | 0.417             |
| FEV <sub>1</sub> (%)     | 43.4 (19.5; 76.9)              | 47.1 (25.3; 71.4)               | <b>0.044</b>      |

Parameters are described as median (5. ; 95. percentile) and tested by Mann-Whitney test.

NON-AE = Non-exacerbator; AE NON-CB = Exacerbator without CB, AE CB = Exacerbator with CB;  
ACOS = Asthma - COPD Overlap Syndrome

## Supplementary Table S4

Distribution of GOLD classification according to phenotypes (N=3 361)

|                   |          | Phenotypes                     |                                |                                |                                | P-value        |
|-------------------|----------|--------------------------------|--------------------------------|--------------------------------|--------------------------------|----------------|
|                   |          | NON-AE<br>N=2 125<br>(a)       | AE NON-CB<br>N=319<br>(b)      | AE CB<br>N=687<br>(c)          | ACOS<br>N=231<br>(d)           |                |
| <b>GOLD (A-D)</b> | <b>A</b> | 264 (12.4%)                    | -                              | -                              | 23 (10.0%)                     | 0.340          |
|                   | <b>B</b> | 957 (45.1%) <sup>d</sup>       | -                              | -                              | 66 (28.6%) <sup>a</sup>        | < <b>0.001</b> |
|                   | <b>C</b> | 73 (3.4%) <sup>b</sup>         | 24 (7.5%) <sup>a, c</sup>      | 16 (2.3%) <sup>b, d</sup>      | 12 (5.2%) <sup>c</sup>         | <b>0.001</b>   |
|                   | <b>D</b> | 830 (39.1%) <sup>b, c, d</sup> | 295 (92.5%) <sup>a, c, d</sup> | 671 (97.7%) <sup>a, b, d</sup> | 130 (56.3%) <sup>a, b, c</sup> | < <b>0.001</b> |

NON-AE = Non-exacerbator; AE NON-CB = Exacerbator without CB

AE CB = Exacerbator with CB; ACOS = Asthma - COPD Overlap Syndrome

Variables are described by absolute (relative) frequencies.

Differences between phenotypes are tested by Fisher exact test. In variables, where the difference is significant, indexes a, b, c, d show statistically significant difference between two phenotypes (Fisher exact test).

**Supplementary Table S5** Prevalence of comorbidities in CEE patients with COPD according to GOLD classification (N=3 361)

|                                        | GOLD categories             |                                |                               |                                | P-value           |
|----------------------------------------|-----------------------------|--------------------------------|-------------------------------|--------------------------------|-------------------|
|                                        | A<br>N=287<br>(a)           | B<br>N=1 023<br>(b)            | C<br>N=125<br>(c)             | D<br>N=1 926<br>(d)            |                   |
| <b>Cardiovascular disease*</b>         | 192 (66.9%) <sup>b, d</sup> | 763 (74.6%) <sup>a</sup>       | 83 (66.4%)                    | 1 409 (73.2%) <sup>a</sup>     | <b>0.025</b>      |
| <b>Myocardial infarction</b>           | 17 (5.9%) <sup>b</sup>      | 108 (10.6%) <sup>a, d</sup>    | 9 (7.2%)                      | 157 (8.2%) <sup>b</sup>        | <b>0.044</b>      |
| <b>Congestive heart failure</b>        | 8 (2.8%) <sup>b, d</sup>    | 117 (11.4%) <sup>a, c, d</sup> | 7 (5.6%) <sup>b, d</sup>      | 311 (16.1%) <sup>a, b, c</sup> | <b>&lt; 0.001</b> |
| <b>Peripheral vascular disease</b>     | 21 (7.3%) <sup>b, d</sup>   | 143 (14.0%) <sup>a, c</sup>    | 9 (7.2%) <sup>b</sup>         | 229 (11.9%) <sup>a</sup>       | <b>0.005</b>      |
| <b>Cerebrovascular Disease</b>         | 10 (3.5%) <sup>b, d</sup>   | 117 (11.4%) <sup>a, c</sup>    | 6 (4.8%) <sup>b</sup>         | 186 (9.7%) <sup>a</sup>        | <b>&lt; 0.001</b> |
| <b>Coronary Artery Disease</b>         | 28 (9.8%) <sup>b, d</sup>   | 239 (23.4%) <sup>a, c</sup>    | 16 (12.8%) <sup>b, d</sup>    | 481 (25.0%) <sup>a, c</sup>    | <b>&lt; 0.001</b> |
| <b>Hypertension</b>                    | 174 (60.6%)                 | 681 (66.6%)                    | 74 (59.2%)                    | 1 218 (63.2%)                  | 0.106             |
| <b>Atrial fibrillation</b>             | 19 (6.6%)                   | 89 (8.7%)                      | 10 (8.0%)                     | 153 (7.9%)                     | 0.719             |
| <b>Pulmonary embolism</b>              | 5 (1.7%)                    | 23 (2.2%)                      | 4 (3.2%)                      | 37 (1.9%)                      | 0.648             |
| <b>Peptic ulcer disease</b>            | 14 (4.9%) <sup>b, d</sup>   | 95 (9.3%) <sup>a</sup>         | 6 (4.8%)                      | 169 (8.8%) <sup>a</sup>        | <b>0.039</b>      |
| <b>Liver disease</b>                   | 8 (2.8%)                    | 41 (4.0%)                      | 2 (1.6%)                      | 96 (5.0%)                      | 0.122             |
| <b>Gastroesophageal reflux Disease</b> | 22 (7.7%)                   | 129 (12.6%)                    | 10 (8.0%)                     | 217 (11.3%)                    | 0.075             |
| <b>Renal disease</b>                   | 5 (1.7%)                    | 26 (2.5%)                      | 4 (3.2%)                      | 74 (3.8%)                      | 0.127             |
| <b>Solid tumour</b>                    | 12 (4.2%)                   | 45 (4.4%)                      | 5 (4.0%)                      | 106 (5.5%)                     | 0.535             |
| <b>Diabetes mellitus</b>               | 38 (13.2%)                  | 171 (16.7%)                    | 13 (10.4%)                    | 315 (16.4%)                    | 0.165             |
| <b>Hyperlipidaemia</b>                 | 72 (25.1%) <sup>c</sup>     | 286 (28.0%) <sup>c</sup>       | 19 (15.2%) <sup>a, b, d</sup> | 518 (26.9%) <sup>c</sup>       | <b>0.016</b>      |
| <b>Anaemia</b>                         | 4 (1.4%) <sup>d</sup>       | 21 (2.1%) <sup>d</sup>         | 1 (0.8%)                      | 80 (4.2%) <sup>a, b</sup>      | <b>0.001</b>      |
| <b>Osteoporosis</b>                    | 14 (4.9%) <sup>d</sup>      | 78 (7.6%) <sup>d</sup>         | 10 (8.0%)                     | 219 (11.4%) <sup>a, b</sup>    | <b>&lt; 0.001</b> |
| <b>Depression</b>                      | 12 (4.2%) <sup>d</sup>      | 73 (7.1%) <sup>d</sup>         | 3 (2.4%) <sup>d</sup>         | 256 (13.3%) <sup>a, b, c</sup> | <b>&lt; 0.001</b> |
| <b>Anxiety</b>                         | 17 (5.9%) <sup>d</sup>      | 77 (7.5%) <sup>c, d</sup>      | 3 (2.4%) <sup>b, d</sup>      | 212 (11.0%) <sup>a, b, c</sup> | <b>&lt; 0.001</b> |
| <b>Insomnia</b>                        | 13 (4.5%) <sup>b, d</sup>   | 134 (13.1%) <sup>a, c</sup>    | 7 (5.6%) <sup>b, d</sup>      | 267 (13.9%) <sup>a, c</sup>    | <b>&lt; 0.001</b> |

\* If any of the following occurred: myocardial infarction, congestive heart failure, peripheral vascular disease, coronary artery disease, hypertension and/or atrial fibrillation

Categorical variables are described by absolute (relative) frequencies.

Differences between GOLD categories are tested by Fisher exact test.

In variables, where the difference is significant, indexes a, b, c, d show statistically significant difference between two categories (Fisher exact test).

**Supplementary Table S6** Inhaler therapy in CEE patients with COPD according to GOLD classification (N=3 361)

|                                       | <b>GOLD categories</b>                 |                                          |                                        |                                          | <b>P-value</b>    |
|---------------------------------------|----------------------------------------|------------------------------------------|----------------------------------------|------------------------------------------|-------------------|
|                                       | <b>A</b><br><b>N=287</b><br><b>(a)</b> | <b>B</b><br><b>N=1 023</b><br><b>(b)</b> | <b>C</b><br><b>N=125</b><br><b>(c)</b> | <b>D</b><br><b>N=1 926</b><br><b>(d)</b> |                   |
| <b>Mono-LAMA</b>                      | 73 (25.4%) <sup>b, c, d</sup>          | 170 (16.6%) <sup>a, c, d</sup>           | 12 (9.7%) <sup>a, b, d</sup>           | 93 (4.8%) <sup>a, b, c</sup>             | <b>&lt; 0.001</b> |
| <b>Mono-LABA</b>                      | 43 (15.0%) <sup>c, d</sup>             | 132 (12.9%) <sup>c, d</sup>              | 3 (2.4%) <sup>a, b</sup>               | 69 (3.6%) <sup>a, b</sup>                | <b>&lt; 0.001</b> |
| <b>Mono-ICS</b>                       | 1 (0.3%)                               | 8 (0.8%)                                 | 1 (0.8%)                               | 14 (0.7%)                                | 0.888             |
| <b>LAMA + LABA</b>                    | 45 (15.7%)                             | 203 (19.8%) <sup>c, d</sup>              | 14 (11.3%) <sup>b</sup>                | 241 (12.5%) <sup>b</sup>                 | <b>&lt; 0.001</b> |
| <b>LAMA + ICS</b>                     | 2 (0.7%)                               | 6 (0.6%)                                 | 1 (0.8%)                               | 14 (0.7%)                                | 0.863             |
| <b>LABA + ICS</b>                     | 47 (16.4%)                             | 141 (13.8%)                              | 23 (18.5%)                             | 307 (15.9%)                              | 0.285             |
| <b>LAMA + LABA + ICS</b>              | 48 (16.7%) <sup>b, c, d</sup>          | 271 (26.5%) <sup>a, c, d</sup>           | 61 (48.8%) <sup>a, b, d</sup>          | 1 135 (58.9%) <sup>a, b, c</sup>         | <b>&lt; 0.001</b> |
| <b>No maintenance inhaler therapy</b> | 28 (9.8%) <sup>d</sup>                 | 92 (9.0%) <sup>d</sup>                   | 10 (8.1%) <sup>d</sup>                 | 53 (2.8%) <sup>a, b, c</sup>             | <b>&lt; 0.001</b> |

ICS – inhaled corticosteroid; LABA – long –acting Beta-agonist; LAMA – long-acting antimuscarinic agent

Categorical variables are described by absolute (relative) frequencies.

Differences between GOLD categories are tested by Fisher exact test.

In variables, where the difference is significant, indexes a, b, c, d show statistically significant difference between two categories (Fisher exact test).
